# Supplementary material
Source: PubMed Central journal article supplement (PMC5322256)
Supplement: NIHMS812248-supplement-429_2016_1286_MOESM1_ESM.pdf [file NIHMS812248-supplement-429_2016_1286_MOESM1_ESM.pdf]

Supplementary material:

Spearman correlations: RoCO

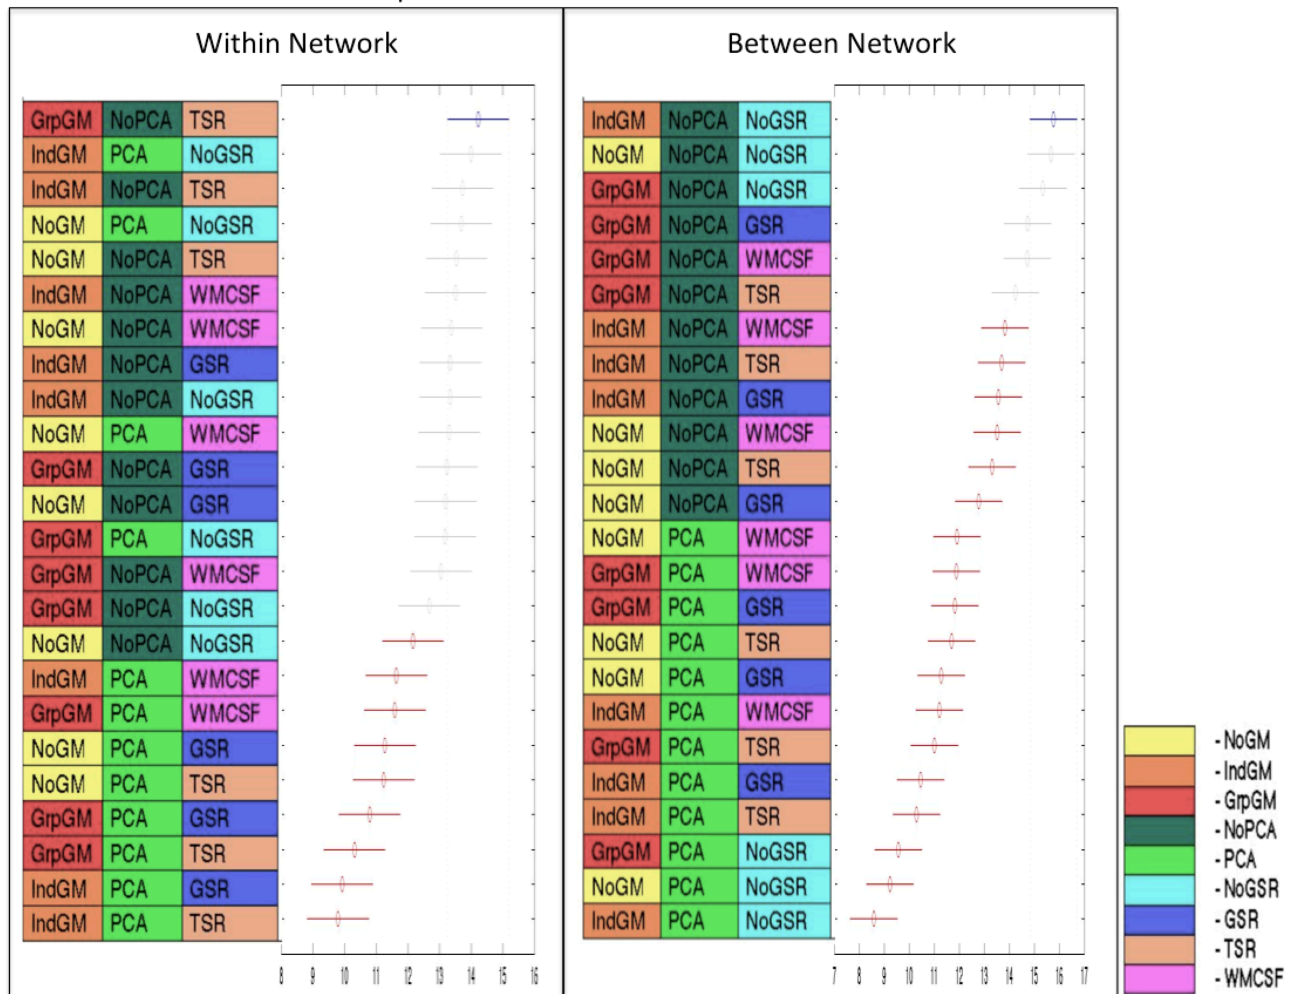

Supplementary figure S1: Individual rankings using a non-parametric Friedman ANOVA of the test-retest reliability on connection level are shown for Spearman correlations of the main analysis conducted using meta-analytically derived cluster volumes.

### Spearman correlations: RoSO

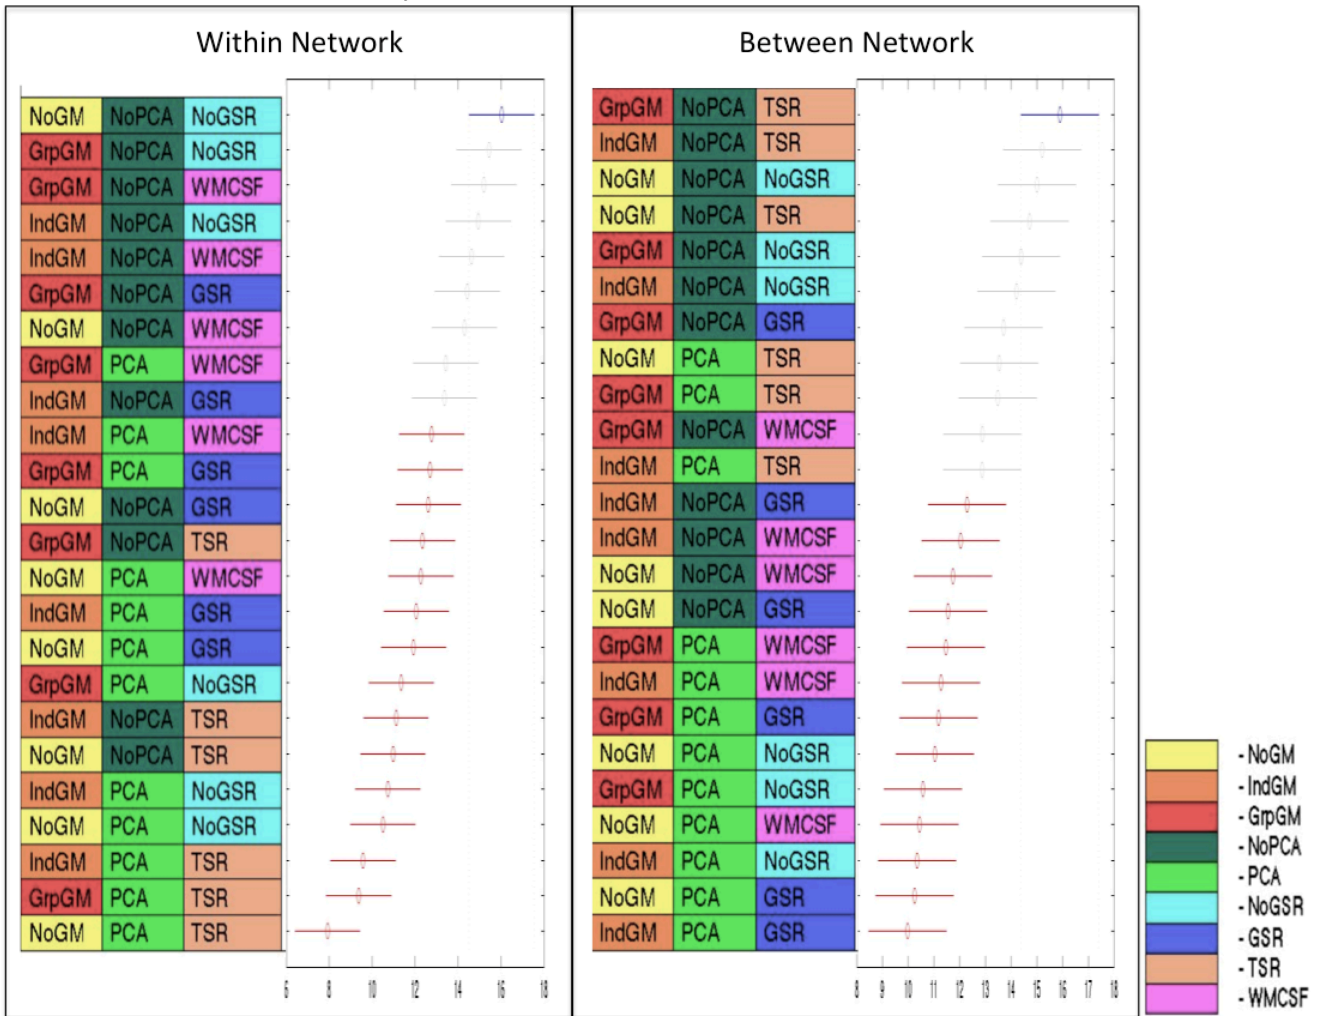

Supplementary figure S2: Individual rankings using a non-parametric Friedman ANOVA of the test-retest reliability on subject level are shown for Spearman correlations of the main analysis conducted using meta-analytically derived cluster volumes.



Absolute differences: RoCO

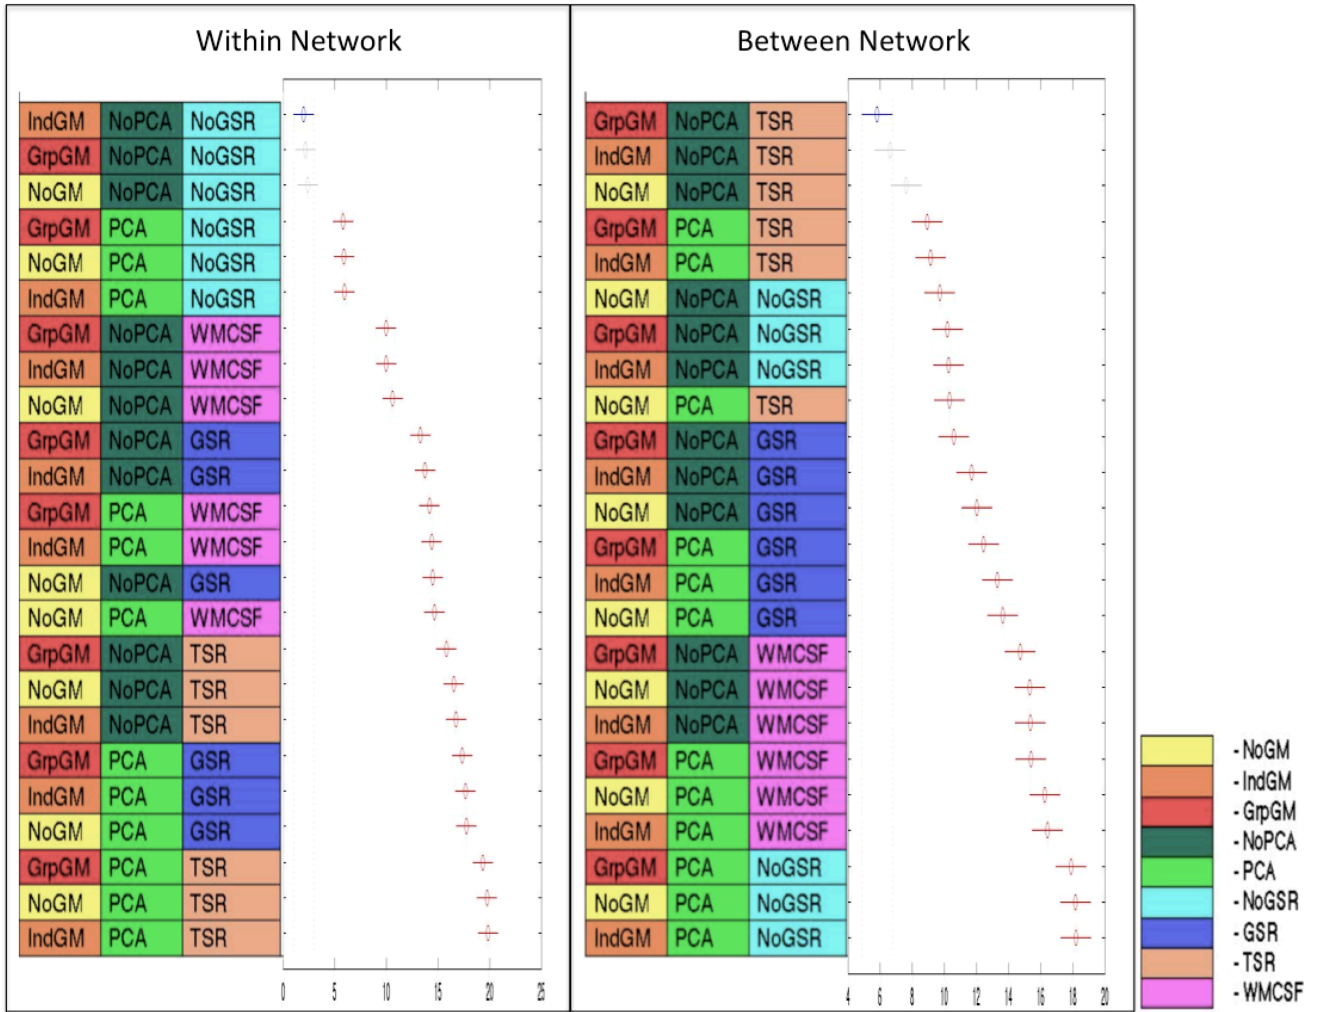

Supplementary figure S3: Individual rankings using a non-parametric Friedman ANOVA of the test-retest reliability on connection level are shown for absolute differences of the main analysis conducted using meta-analytically derived cluster volumes.

Absolute differences: RoSO

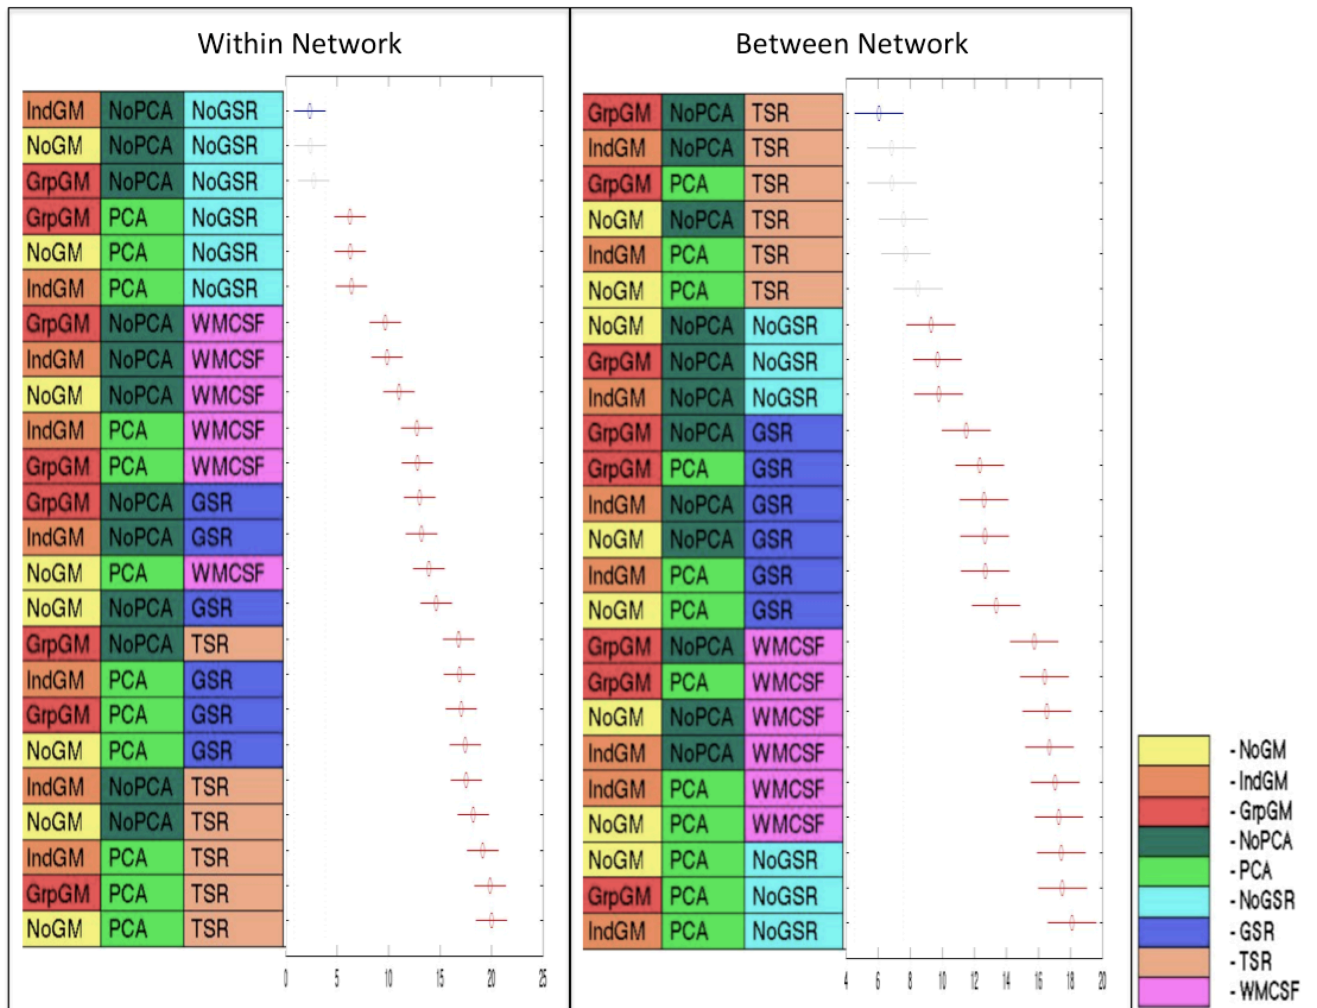

Supplementary figure S4: Individual rankings using a non-parametric Friedman ANOVA of the test-retest reliability on subject level are shown for absolute differences of the main analysis conducted using meta-analytically derived cluster volumes.

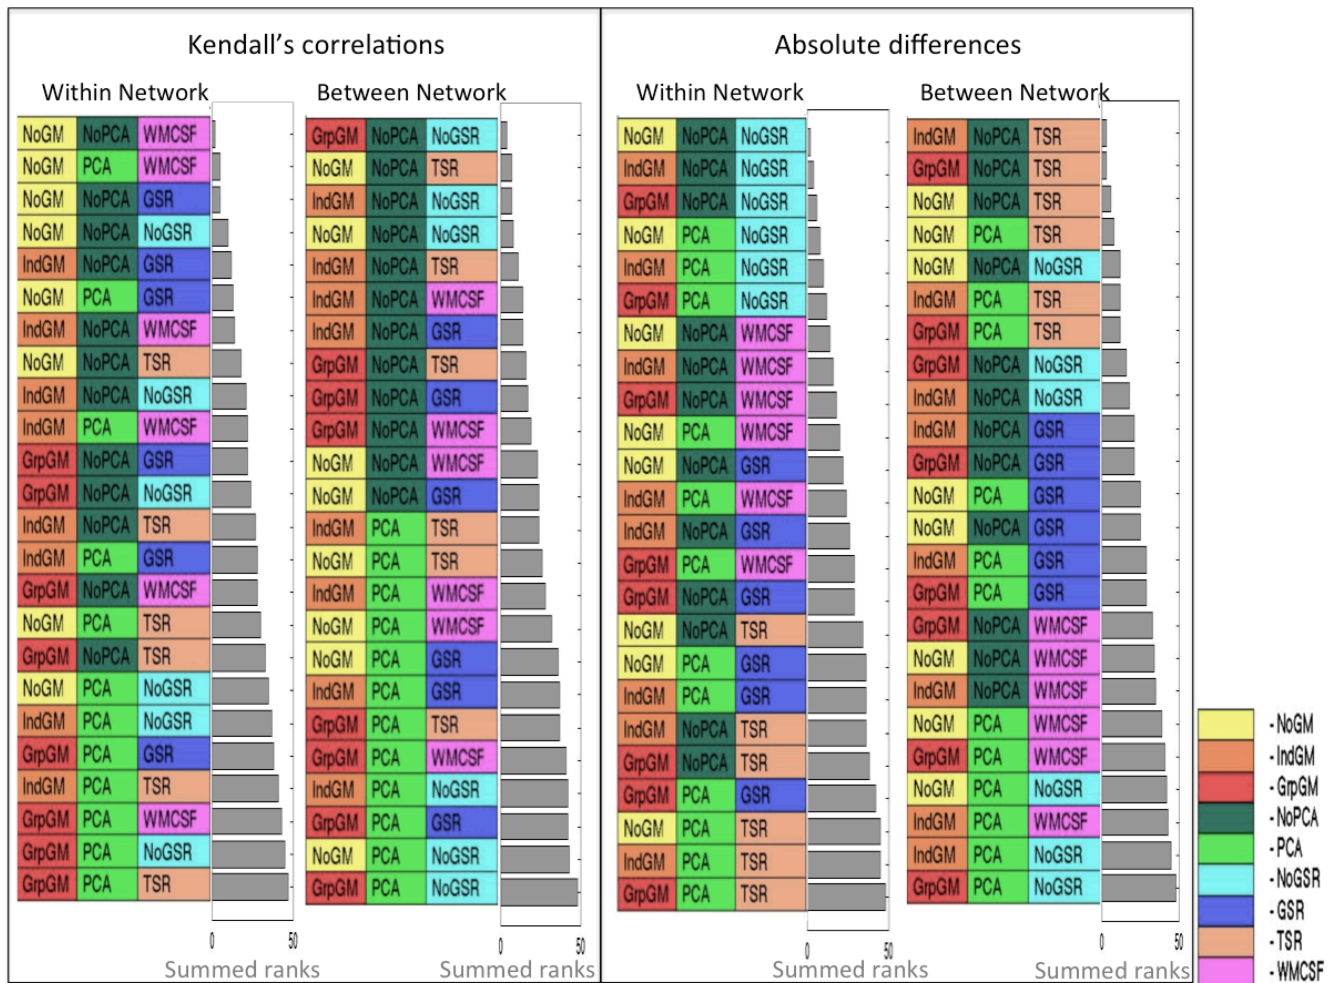

Supplementary figure S5: Combined rankings of the test-retest reliability on subject and connection level are shown for Spearman correlations and absolute differences of the analysis conducted using spherical ROIs of 5 mm radius rather than the actual cluster volumes

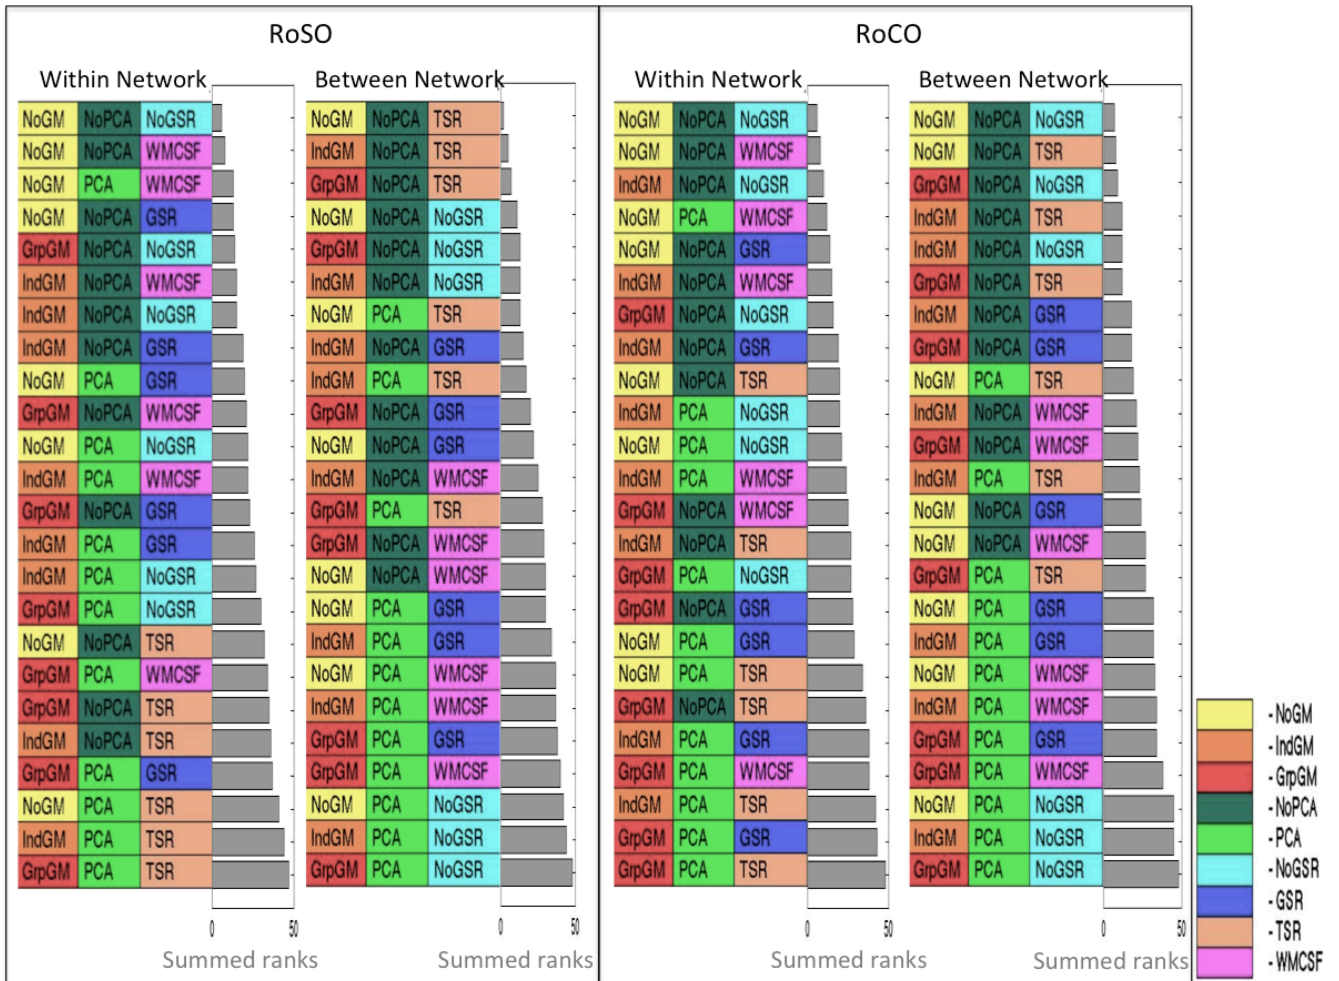

Supplementary figure S6: Combined rankings of the test-retest reliability on subject and connection level are shown for RoSO and RoCO of the analysis conducted using spherical ROIs of 5 mm radius rather than the actual cluster volumes



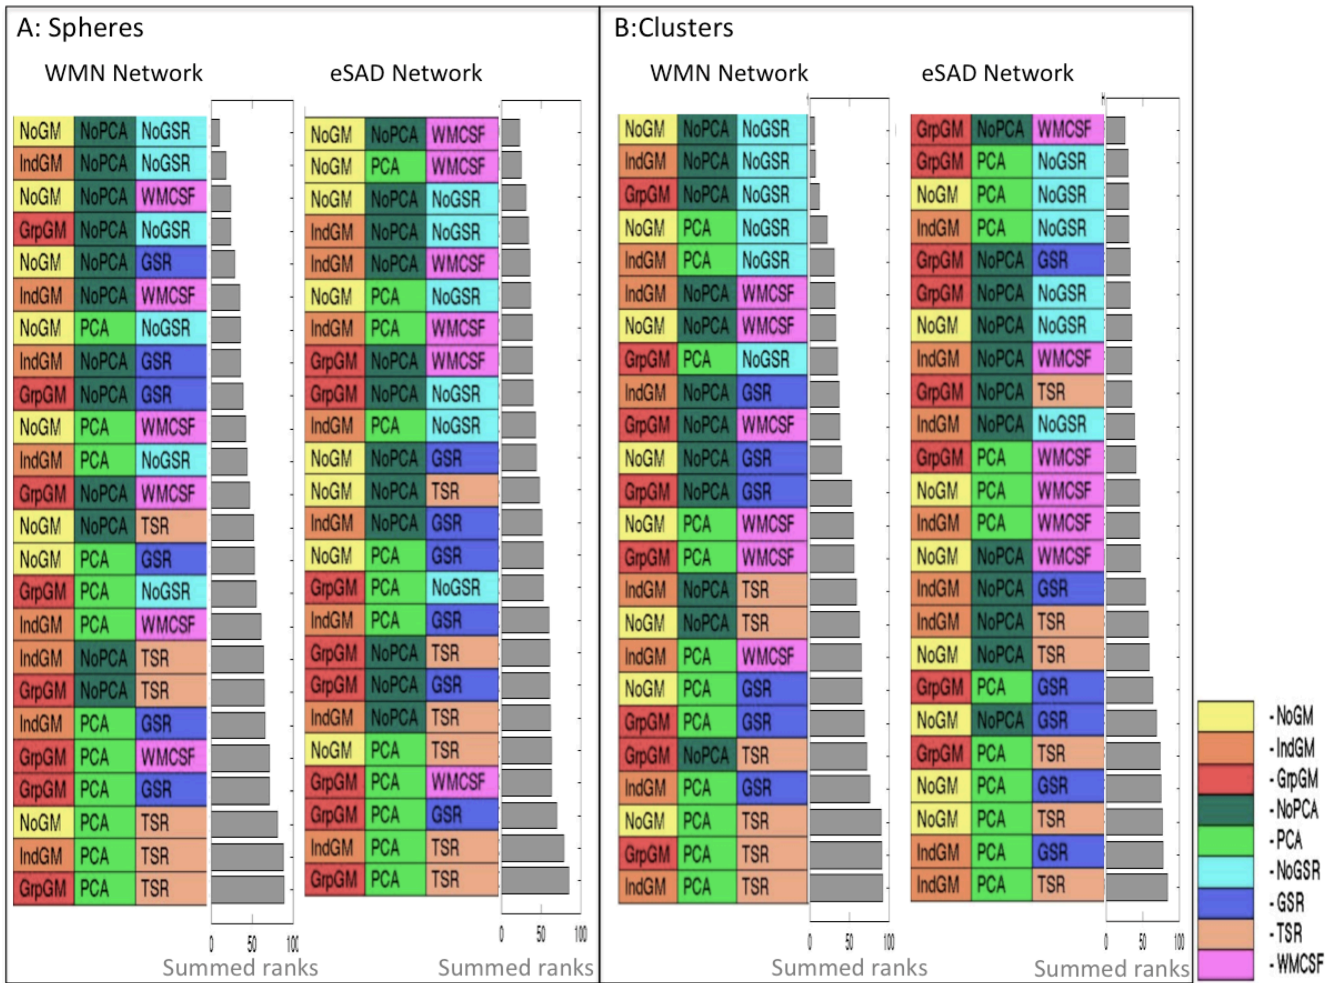

Supplementary figure S7: Summary rankings of reliability across Spearman correlations and absolute differences as well as RoSO and RoCO are shown separately for WMN and eSAD networks for the analyses that defined the volume of interest A) by using spherical ROIs of 5 mm radius and B) by using the actual cluster volumes



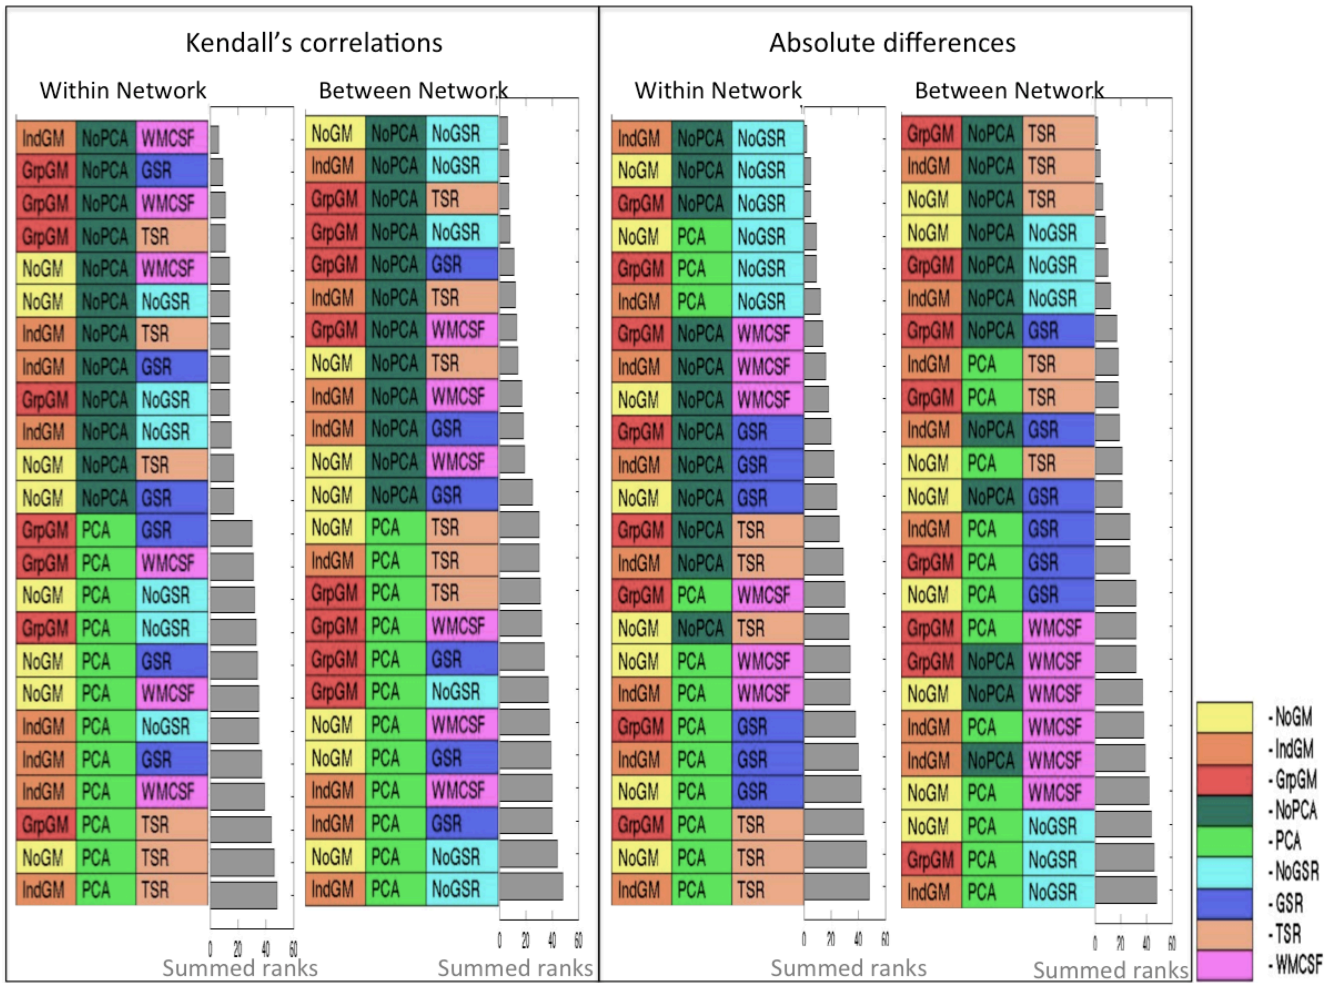

Supplementary figure S8: Combined rankings of the test-retest reliability on subject and connection level are shown for Spearman correlations and absolute differences of the analysis conducted using 5 components of PCA derived from the whole brain rather than only the WM and CSF regions.

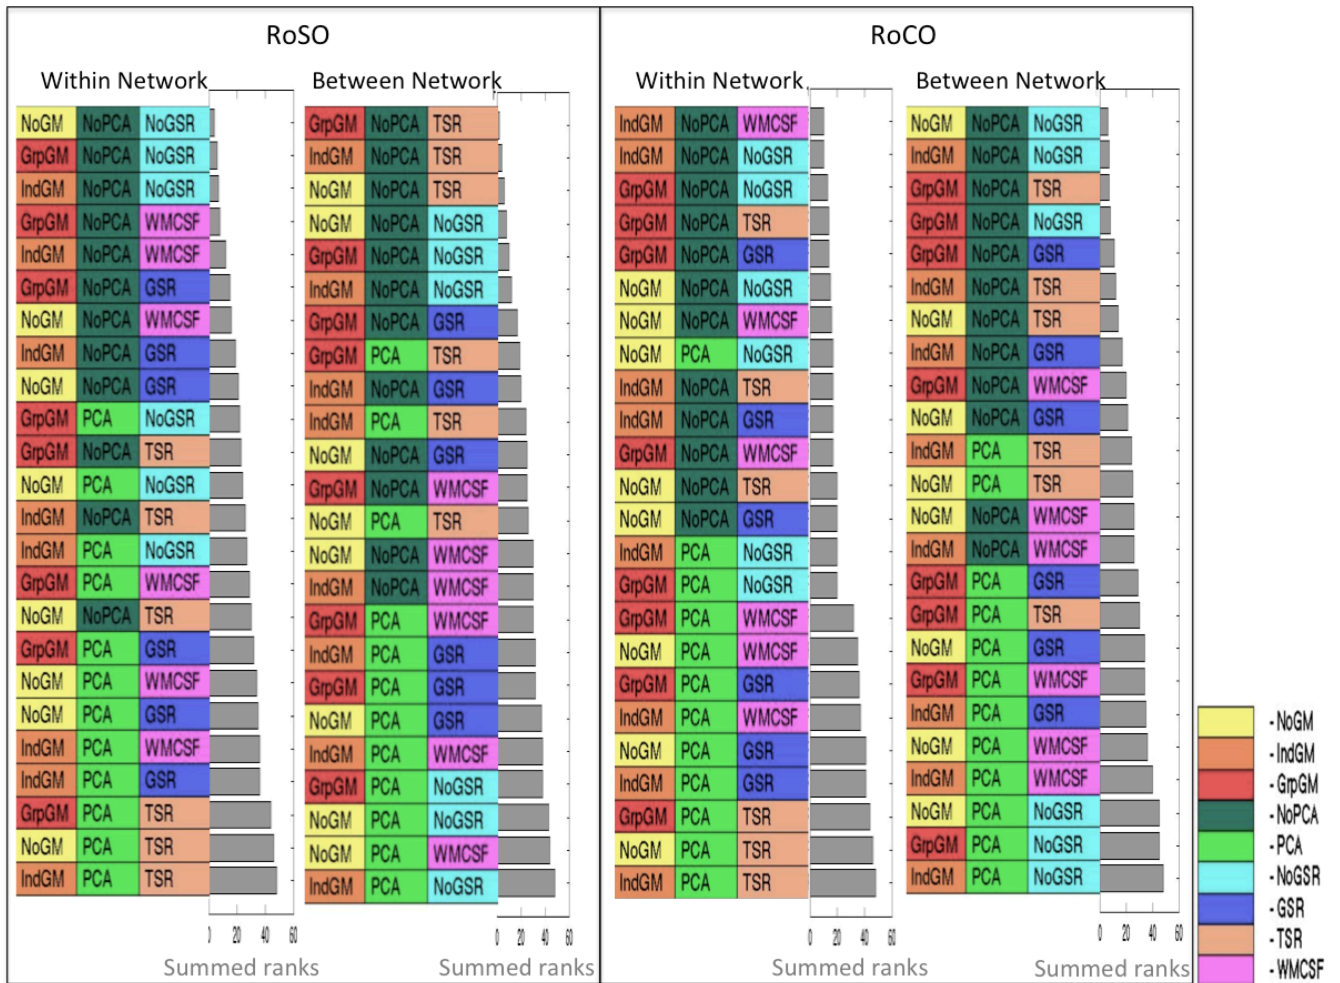

Supplementary figure S9: Combined rankings of the test-retest reliability on subject and connection level are shown for RoSO and RoCO of the analysis conducted using 5 components of PCA derived from the whole brain rather than only the WM and CSF regions.

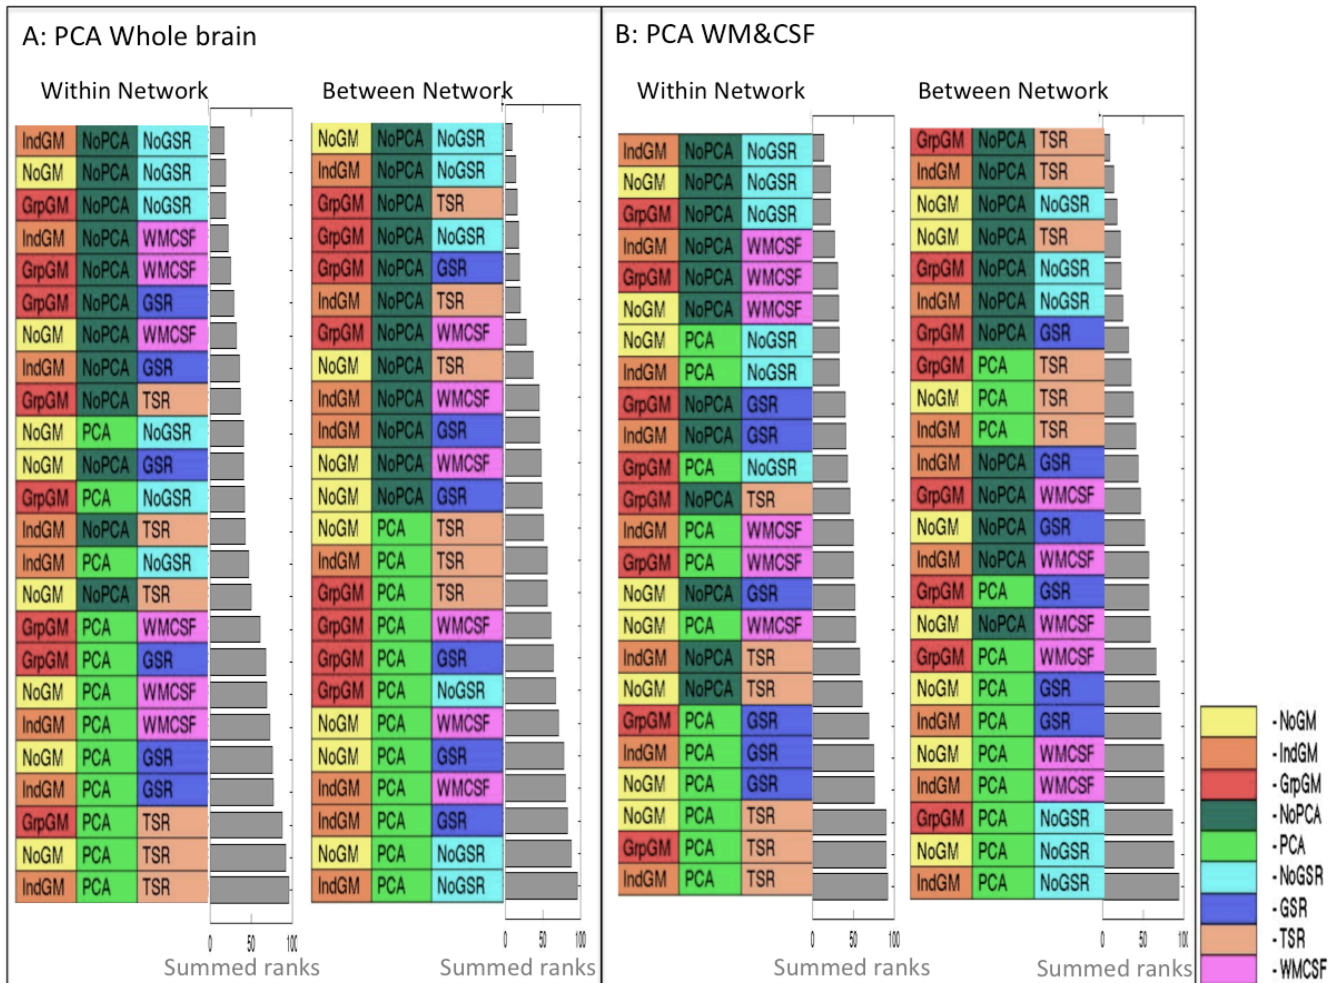

Supplementary figure S10: Summary rankings of reliability across Spearman correlations and absolute differences as well as RoSO and RoCO are shown separately for within (WMN & eSAD) and between networks for the analyses A) PCA components derived from the entire brain and B) PCA components derived from the WM & CSF regions.
